# Supplementary material
Source: HighWire-hosted journal article supplement (https://tech.snmjournals.org/highwire/filestream/8676/field_highwire_adjunct_files/0/233486_Supplemental_Data.pdf)
Supplement: 233486_Supplemental_Data.pdf [file 233486_Supplemental_Data.pdf]

**Supplemental Table 1.** Characteristics of subjects with extremes of each kinetic parameter in the group with complete gallbladder emptying

|                                       | <i>Average rate of GB emptying</i> |                       |                      |                       |                      |                       | <i>Peak rate of GB emptying</i> |                       |                       |                       |                      |                       | <i>Average rate of GB emptying over 0-20 min interval</i> |                       |                      |                       |                      |                       |
|---------------------------------------|------------------------------------|-----------------------|----------------------|-----------------------|----------------------|-----------------------|---------------------------------|-----------------------|-----------------------|-----------------------|----------------------|-----------------------|-----------------------------------------------------------|-----------------------|----------------------|-----------------------|----------------------|-----------------------|
|                                       | Total                              |                       | Male                 |                       | Female               |                       | Total                           |                       | Male                  |                       | Female               |                       | Total                                                     |                       | Male                 |                       | Female               |                       |
|                                       | Upper 20%<br>4.6±1.5               | Lower 20%<br>1.8±0.2* | Upper 20%<br>4.6±1.9 | Lower 20%<br>1.8±0.2* | Upper 20%<br>4.6±1.2 | Lower 20%<br>1.8±0.1* | Upper 20%<br>9.9±1.8            | Lower 20%<br>3.5±0.6* | Upper 20%<br>10.3±2.3 | Lower 20%<br>3.7±0.5* | Upper 20%<br>9.8±1.4 | Lower 20%<br>3.4±0.7* | Upper 20%<br>4.5±0.1                                      | Lower 20%<br>2.6±0.5* | Upper 20%<br>4.5±0.1 | Lower 20%<br>2.7±0.3* | Upper 20%<br>4.6±0.1 | Lower 20%<br>2.5±0.5* |
| Age, years<br>n                       | 52.5±17.3<br>28                    | 50±12.9<br>28         | 55.5±18.0<br>12      | 51±17.4<br>7          | 50.3±17.0<br>16      | 49.6±11.5<br>21       | 57.4±18.2<br>28                 | 51.6±15.4<br>28       | 60.4±16.4<br>11       | 53.7±15.5<br>10       | 55.5±19.6<br>17      | 18<br>50.5±15.7       | 58.5±16.5<br>28                                           | 49.8±13.4*<br>28      | 60.4±15.5<br>16      | 53.6±15.9<br>7        | 56.0±18.0<br>12      | 48.5±12.6<br>21       |
| Male, n<br>Female, n                  | 12<br>16                           | 7<br>21               | 12<br>0              | 7<br>0                | 0<br>16              | 0<br>21               | 11<br>17                        | 10<br>18              | 11<br>0               | 10<br>0               | 0<br>17              | 0<br>18               | 16<br>12                                                  | 7<br>21               | 16<br>0              | 7<br>0                | 0<br>12              | 0<br>21               |
| Weight, kg<br>n                       | 82.9±24.2<br>27                    | 74±19<br>28           | 94.3±28.7<br>12      | 87.9±15.6<br>7        | 73.7±15.5<br>15      | 69.3±17.9<br>21       | 78.9±23.1<br>27                 | 71.4±15<br>28         | 93.9±28.7<br>11       | 83.7±9.7<br>10        | 68.6±9.8<br>16       | 64.6±13.0<br>18       | 86.5±22<br>27                                             | 70.6±16.0*<br>28      | 92.5±23.6<br>16      | 84.7±11<br>7          | 77.8±15<br>11        | 65.8±14.7*<br>21      |
| BMI, kg/m2<br>n                       | 28.4±7.5<br>27                     | 27.3±5.7<br>27        | 29.5±8.4<br>12       | 29.8±3.0<br>7         | 27.4±6.8<br>15       | 26.4±6.3<br>20        | 27.3±6.4<br>26                  | 25.4±4.4<br>27        | 29.6±8.3<br>11        | 26.9±3.2<br>10        | 25.7±4.2<br>15       | 24.5±4.9<br>17        | 29.1±6.6<br>27                                            | 25.6±5.4*<br>27       | 29.0±7.1<br>16       | 28.4±3.7<br>7         | 29.2±6.2<br>11       | 24.7±5.6<br>20        |
| Fasting glucose,<br>mg/dL, n          | 106.1±21.7<br>24                   | 96.1±15.8*<br>21      | 120.9±27.3<br>9      | 91.4±10.9*<br>5       | 97.3±11.0<br>15      | 97.6±17.1<br>16       | 103.3±19.3<br>24                | 94.5±15.3*<br>24      | 112±26<br>10          | 92.8±10.2*<br>9       | 97.1±9.5<br>14       | 95.5±17.9<br>15       | 105.8±23.7<br>21                                          | 90.3±12.4*<br>25      | 111.2±28.5<br>12     | 91±10.4<br>7          | 98.7±13.5<br>9       | 90±13.3<br>18         |
| Serum cholesterol<br>mg/dL, n         | 185.2±29.6<br>15                   | 210.3±33.6*<br>12     | 176.7±20.5<br>6      | 233.5±82.7<br>2       | 190.9±34.3<br>9      | 205.6±21.8<br>10      | 185.4±20.7<br>13                | 200.5±40.5<br>13      | 166.3±12.2<br>6       | 205.6±58.7<br>5       | 201.7±7.5<br>7       | 197.4±28.4<br>8       | 182.8±21.6<br>12                                          | 200.8±35.6<br>13      | 178.5±20.8<br>8      | 222.7±61.4<br>3       | 191.3±23.5<br>4      | 194.2±25.4<br>10      |
| LDL cholesterol<br>mg/dL, n           | 96.6±29.4<br>12                    | 123.3±23.8*<br>11     | 81.7±13.3<br>3       | 134±48.1<br>2         | 101.6±32.2<br>9      | 120.9±19.5<br>9       | 100.0±21<br>12                  | 120.5±28.4*<br>11     | 85.4±11.5<br>5        | 127.3±30.1*<br>4      | 110.6±20.3<br>7      | 116.7±29.0<br>7       | 91.8±18.2<br>9                                            | 112.4±30.1<br>11      | 87.6±16.6<br>5       | 126±36.7<br>3         | 97.0±21.4<br>4       | 107.3±28.3<br>8       |
| HDL cholesterol<br>mg/dL, n           | 58.1±19.6<br>15                    | 65.2±13.3<br>12       | 49.2±12.4<br>6       | 54±9.9<br>2           | 64±21.8<br>9         | 67.4±13.1<br>10       | 54.7±17.9<br>13                 | 59.8±9.4<br>13        | 50.5±12.0<br>6        | 55.4±11.2<br>5        | 58.3±22.1<br>7       | 62.5±7.7<br>8         | 55.3±16<br>12                                             | 64.3±16.8<br>13       | 53.4±12.7<br>8       | 59.7±12.1<br>3        | 59±23.1<br>4         | 65.7±18.3<br>10       |
| Triglycerides<br>mg/dL, n             | 146±95.2<br>15                     | 105.5±89.2<br>12      | 175.2±96.3<br>6      | 227±220.6<br>2        | 129.6±94.8<br>9      | 81.2±19.4<br>10       | 158±93.3<br>13                  | 121±93.5<br>13        | 150.7±102.5<br>6      | 184.6±132<br>5        | 164.3±92.6<br>7      | 81.3±17.0*<br>8       | 166.4±102.7<br>12                                         | 112.9±90.5<br>13      | 161.6±98.6<br>8      | 184.3±172.6<br>3      | 176±125.7<br>4       | 91.5±45.6<br>10       |
| Systolic blood<br>pressure, mm Hg, n  | 123.3±16.4<br>25                   | 122.8±18.0<br>25      | 126.3±18.9<br>11     | 125.7±16.4<br>6       | 120.9±14.4<br>14     | 121.8±18.8<br>19      | 135.1±17.8<br>24                | 122±15.1*<br>26       | 137.8±14.8<br>9       | 127.9±13.5<br>9       | 133.5±19.7<br>15     | 118.9±15.3*<br>17     | 130.2±18.8<br>24                                          | 121.9±16.9<br>26      | 129.1±19.7<br>14     | 131±14.9<br>6         | 131.7±18.3<br>10     | 119.2±16.9<br>20      |
| Diastolic blood<br>pressure, mm Hg, n | 75.9±7.9<br>25                     | 75.3±12.0<br>25       | 78±7.0<br>11         | 76±12.7<br>6          | 74.3±8.5<br>14       | 75.3±12.2<br>19       | 78.5±8.8<br>24                  | 73.9±11.2<br>26       | 78.9±9.5<br>9         | 79.3±10.4<br>9        | 78.2±8.7<br>15       | 71±10.9<br>17         | 76.9±8.5<br>24                                            | 74.3±11.1<br>26       | 77.4±8.7<br>14       | 79.7±11.3<br>6        | 76.3±8.7<br>10       | 72.7±10.8<br>20       |

Values are expressed as means±S.D. Fasting glucose only included for non-diabetics. \*p≤0.05, comparing values for the upper and lower quintiles for each parameter.
